# Supplementary material
Source: HighWire-hosted journal article supplement (https://bmjopen.bmj.com/content/11/12/e053825)
Supplement: inline-supplementary-material-1 [file inline-supplementary-material-1.pdf]

**Supplementary file 1: Search strategies for electronic databases****Strategy for PubMed**

| Search # | Search term                                                                                                                                                                                                                                                                                                                                                                                                                                                                                                                                                                                                                                                                                      |
|----------|--------------------------------------------------------------------------------------------------------------------------------------------------------------------------------------------------------------------------------------------------------------------------------------------------------------------------------------------------------------------------------------------------------------------------------------------------------------------------------------------------------------------------------------------------------------------------------------------------------------------------------------------------------------------------------------------------|
| 1)       | Hypertension* OR "High blood pressure*" OR "unrecognized hypertension*" OR diastolic hypertension* OR "systolic hypertension*" OR Cardiometabolic*                                                                                                                                                                                                                                                                                                                                                                                                                                                                                                                                               |
| 2)       | "risk factors" OR "associated factors" OR causes OR "precipitating factors" OR determinants                                                                                                                                                                                                                                                                                                                                                                                                                                                                                                                                                                                                      |
| 3)       | 1 AND 2                                                                                                                                                                                                                                                                                                                                                                                                                                                                                                                                                                                                                                                                                          |
| 4)       | Driver* OR Lorry driver* OR truck driver* OR trucker* OR Commercial drivers* OR professional driver*                                                                                                                                                                                                                                                                                                                                                                                                                                                                                                                                                                                             |
| 5)       | 3 AND 4                                                                                                                                                                                                                                                                                                                                                                                                                                                                                                                                                                                                                                                                                          |
| 6)       | Sub-Saharan Africa                                                                                                                                                                                                                                                                                                                                                                                                                                                                                                                                                                                                                                                                               |
| 7)       | "Angola" OR "Benin" OR "Botswana" OR "Burkina Faso" OR "Burundi" OR "Cameroon" OR "Cape Verde" OR "Central African Republic" OR "Chad" OR "Comoros" OR "Congo" OR "Cote d'Ivoire" OR "Djibouti" OR "Equatorial Guinea" OR "Ethiopia" OR "Gabon" OR "The Gambia" OR "Ghana" OR "Guinea" OR "Guinea-Bissau" OR "Kenya" OR "Lesotho" OR "Liberia" OR "Madagascar" OR "Malawi" OR "Mali" OR "Mauritania" OR "Mauritius" OR "Mozambique" OR "Namibia" OR "Niger" OR "Nigeria" OR "Rwanda" OR "Sao Tome and Principe" OR "Senegal" OR "Seychelles" OR "Sierra Leone" OR "Somalia" OR "South Africa" OR "Sudan" OR "Swaziland" OR "Tanzania" OR "Togo" OR "Uganda" OR "Zaire" OR "Zambia" OR "Zimbabwe" |
| 8)       | 5 OR 6 OR 7                                                                                                                                                                                                                                                                                                                                                                                                                                                                                                                                                                                                                                                                                      |
| 9)       | Limit to January, 2010-December,2020                                                                                                                                                                                                                                                                                                                                                                                                                                                                                                                                                                                                                                                             |
| 10)      | Limit to Humans                                                                                                                                                                                                                                                                                                                                                                                                                                                                                                                                                                                                                                                                                  |
| 11)      | 8 AND 9 AND 10                                                                                                                                                                                                                                                                                                                                                                                                                                                                                                                                                                                                                                                                                   |

**Africa Journal Online (AJOL)**

Hypertension OR "High blood pressure" OR "unrecognized hypertension" OR "diastolic hypertension" OR "systolic hypertension" OR Cardiometabolic AND "Driver" OR "Lorry driver" OR "truck driver" OR "trucker" OR "Commercial drivers" OR "professional drivers" "Angola" OR "Benin" OR "Botswana" OR "Burkina Faso" OR "Burundi" OR "Cameroon" OR "Cape Verde" OR "Central African Republic" OR "Chad" OR "Comoros" OR "Congo" OR "Cote d'Ivoire" OR "Djibouti" OR "Equatorial Guinea" OR "Ethiopia" OR "Gabon" OR "The Gambia" OR "Ghana" OR "Guinea" OR "Guinea-Bissau" OR "Kenya" OR "Lesotho" OR "Liberia" OR "Madagascar" OR "Malawi" OR "Mali" OR "Mauritania" OR "Mauritius" OR "Mozambique" OR "Namibia" OR "Niger" OR "Nigeria" OR "Rwanda" OR "Sao Tome and Principe" OR "Senegal" OR "Seychelles" OR "Sierra Leone" OR "Somalia" OR "South Africa" OR "Sudan" OR "Swaziland" OR "Tanzania" OR "Togo" OR "Uganda" OR "Zaire" OR "Zambia" OR "Zimbabwe"

**Cochrane Library**

Hypertension OR "High blood pressure" OR "unrecognized hypertension" OR "diastolic hypertension" OR "systolic hypertension" OR Cardiometabolic AND "Driver" OR "Lorry driver" OR "truck driver" OR "trucker" OR "Commercial drivers" OR "professional drivers" "Angola" OR "Benin" OR "Botswana" OR "Burkina Faso" OR "Burundi" OR "Cameroon" OR "Cape Verde" OR "Central African Republic" OR "Chad" OR "Comoros" OR "Congo" OR "Cote d'Ivoire" OR "Djibouti" OR "Equatorial Guinea" OR "Ethiopia" OR "Gabon" OR "The Gambia" OR "Ghana" OR "Guinea" OR "Guinea-Bissau" OR "Kenya" OR "Lesotho" OR "Liberia" OR "Madagascar" OR "Malawi" OR "Mali" OR "Mauritania" OR "Mauritius" OR "Mozambique" OR "Namibia" OR "Niger" OR "Nigeria" OR "Rwanda"

OR "Sao Tome and Principe" OR "Senegal" OR "Seychelles" OR "Sierra Leone" OR  
"Somalia" OR "South Africa" OR "Sudan" OR "Swaziland" OR "Tanzania" OR "Togo"  
OR "Uganda" OR "Zaire" OR "Zambia" OR "Zimbabwe"

**Google scholar**

'Burden of Hypertension and risk factors among Male Commercial Drivers in Sub-Saharan  
Africa''
