# Supplementary material
Source: HighWire-hosted journal article supplement (https://bmjopen.bmj.com/content/11/12/e053825)
Supplement: inline-supplementary-material-3 [file inline-supplementary-material-3.pdf]

**Supplementary file 3:** Sensitivity analysis of pooled burden of hypertension for each study being omitted with 95% CI

| Study omitted            | Pooled Hypertension Burden (%) | 95% CI    | Reference |
|--------------------------|--------------------------------|-----------|-----------|
| Appiah et al., 2020      | 30.0                           | 23.0-37.0 | (1)       |
| Shownade et al.2020      | 31.0                           | 23.0-39.0 | (2)       |
| Oyenyi et al.2016        | 34.0                           | 26.0-41.0 | (3)       |
| Lalla-Edward et al.,2019 | 31.0                           | 23.0-39.0 | (4)       |
| Setorglo et al., 2019    | 32.0                           | 24.0-40.0 | (5)       |
| Aban, 2013               | 32.0                           | 24.0-40.0 | (6)       |
| Anto et al.,2020         | 31.0                           | 23.0-39.0 | (7)       |
| Odeyinka et al., 2019    | 32.0                           | 24.0-40.0 | (8)       |
| Yosef , 2020             | 33.0                           | 25.0-41.0 | (9)       |
| Adedokun et al., 2017    | 29.0                           | 23.0-36.0 | (10)      |
| Amoran et al.,2014       | 32.0                           | 24.0-40.0 | (11)      |
| Amadi et al., 2015       | 31.0                           | 23.0-39.0 | (12)      |
| Tobin et al., 2013       | 32.0                           | 24.0-40.0 | (13)      |
| Erhiano et al.,2015      | 32.0                           | 23.0-40.0 | (14)      |
| Overall                  | 32.0                           | 24.0-39.0 |           |
