# Supplementary material
Source: HighWire-hosted journal article supplement (https://bmjopen.bmj.com/content/11/12/e053825)
Supplement: inline-supplementary-material-4 [file inline-supplementary-material-4.pdf]

**Supplementary file 4:** All risk factors for hypertension amongst commercial drivers in Sub-Saharan Africa

| Author             | Country      | Risk factor information                                                                                                                                                                                                                                                                                                                |
|--------------------|--------------|----------------------------------------------------------------------------------------------------------------------------------------------------------------------------------------------------------------------------------------------------------------------------------------------------------------------------------------|
| Appiah et al.      | Ghana        | Not reported                                                                                                                                                                                                                                                                                                                           |
| Shownade et al.    | Nigeria      | Not reported                                                                                                                                                                                                                                                                                                                           |
| Oyeniyi et al.     | Nigeria      | <ol style="list-style-type: none"> <li>1. Overweight/obese AOR=6.2, [95% CI:1.9-20.7]</li> <li>2. Central obesity AOR=6.4, [95% CI:1.5-27.0]</li> <li>3. Family Hx: AOR=4.1, [95% CI:1.9-80]</li> <li>4. Hypercholesterolemia: AOR=4.0, [(95% CI:1.2-13.2)]</li> </ol>                                                                 |
| Lalla-Edward et al | South Africa | Not reported                                                                                                                                                                                                                                                                                                                           |
| Setorglo et al.    | Ghana        | Not reported                                                                                                                                                                                                                                                                                                                           |
| Aban               | Ghana        | <ol style="list-style-type: none"> <li>1. Duration of driving (&gt;14yrs): AOR=7.7, [95% CI:2.6-25.0]</li> </ol>                                                                                                                                                                                                                       |
| Anto et al.        | Ghana        | <ol style="list-style-type: none"> <li>1. Ageing: AOR=5.1, [95% CI:2.1-12.3]</li> <li>2. Current smoker: AOR=7.1, [95% CI:1.5-33.8]</li> <li>3. Alcohol: AOR=3.2, [95% CI:2.1-4.8]</li> <li>4. Sleep inhibitors: AOR=3.2, [95% CI:2.0-5.3]</li> <li>5. Night eating: AOR=8.2, [95%CI:5.5-12.2]</li> </ol>                              |
| Odeyinka et al     | Nigeria      | <ol style="list-style-type: none"> <li>1. Advanced Age: AOR=2.4, [95% CI:1.0-5.9]</li> <li>2. Central Obesity: AOR=2.4, [95% CI:1.0-5.8]</li> </ol>                                                                                                                                                                                    |
| Yosef              | Ethiopia     | <ol style="list-style-type: none"> <li>1. Not reported</li> </ol>                                                                                                                                                                                                                                                                      |
| Adedokun et al.    | Nigeria      | <ol style="list-style-type: none"> <li>1. Advanced Age: AOR=2.2, [95% CI:1.3-3.7]</li> <li>2. Overweight/Obese: AOR=3.4, [95% CI:2.1-5.4]</li> <li>3. Alcohol consumption: AOR=2.8, [95% CI:1.7-4.4]</li> <li>4. Duration of driving (&gt;5yrs.): AOR=1.8, [95% CI:1.1-2.7]</li> <li>5. Diabetes: AOR=3.1, [95% CI:1.5-6.4]</li> </ol> |
| Amoran et al       | Nigeria      | <ol style="list-style-type: none"> <li>1. Not reported</li> </ol>                                                                                                                                                                                                                                                                      |
| Amadi et al        | Nigeria      | <ol style="list-style-type: none"> <li>1. Advanced Age: AOR=1.1 [95% CI:1.1-1.2]</li> <li>2. Overweight/Obese: AOR=3.0, [95% CI:1.7-5.3]</li> <li>2.</li> </ol>                                                                                                                                                                        |
| Tobin et al        | Nigeria      | <ol style="list-style-type: none"> <li>1. Not reported</li> </ol>                                                                                                                                                                                                                                                                      |
| Erhiano et al.,    | Nigeria      | <ol style="list-style-type: none"> <li>1. Advanced Age:AOR=4.2, [95% CI:2.2-6.0]</li> <li>2. Overweight/Obese: AOR=3.9, [95% CI:2.7-8.2]</li> <li>2.</li> </ol>                                                                                                                                                                        |
